# Supplementary material for: Low Doses of Ionizing Radiation as a Treatment for Alzheimer’s Disease: A Pilot Study
Source: PubMed Central journal article supplement — J Alzheimers Dis. 2021 Apr 6;80(3):1119–28. doi: 10.3233/JAD-200620 (PMC8150498; doi:10.3233/jad-200620), 2021-04-06
Supplement: jad-80-jad200620-s001.pdf [file jad-80-jad200620-s001.pdf]

# Supplementary Material

## Low Doses of Ionizing Radiation as a Treatment for Alzheimer’s Disease: A Pilot Study

**Supplementary Table 1.** CMAI assessment scores for the four participants

| Serial CMAI Scores                                 | Case 1 |   | Case 2 |   |   |   |   |   |   |   |   |    | Case 3 |   |   |   |   |   |   |   |   |    | Case 4 |   |   |   |   |   |   |   |   |    |   |   |
|----------------------------------------------------|--------|---|--------|---|---|---|---|---|---|---|---|----|--------|---|---|---|---|---|---|---|---|----|--------|---|---|---|---|---|---|---|---|----|---|---|
|                                                    | 1      | 2 | 1      | 2 | 3 | 4 | 5 | 6 | 7 | 8 | 9 | 10 | 1      | 2 | 3 | 4 | 5 | 6 | 7 | 8 | 9 | 10 | 1      | 2 | 3 | 4 | 5 | 6 | 7 | 8 | 9 | 10 |   |   |
| Pacing, aimless wandering                          | 4      | 4 | 1      | 1 | 1 | 1 | 1 | 1 | 1 | 1 | 1 | 1  | 1      | 1 | 1 | 1 | 1 | 1 | 1 | 1 | 1 | 1  | 1      | 1 | 1 | 1 | 1 | 1 | 1 | 1 | 1 | 1  | 1 |   |
| Inappropriate dress or disrobing                   | 2      | 2 | 1      | 1 | 1 | 1 | 1 | 1 | 1 | 1 | 1 | 1  | 1      | 1 | 1 | 1 | 1 | 1 | 1 | 1 | 1 | 1  | 1      | 1 | 1 | 1 | 1 | 1 | 1 | 1 | 1 | 1  | 1 |   |
| Spitting                                           | 1      | 1 | 1      | 1 | 1 | 1 | 1 | 1 | 1 | 1 | 1 | 1  | 1      | 5 | 5 | 5 | 5 | 4 | 5 | 5 | 3 | 3  | 3      | 3 | 3 | 3 | 3 | 3 | 3 | 3 | 3 | 3  | 3 |   |
| Cursing or verbal aggression                       | 1      | 1 | 1      | 1 | 1 | 1 | 1 | 1 | 1 | 1 | 1 | 1  | 1      | 1 | 1 | 1 | 1 | 1 | 1 | 1 | 1 | 1  | 1      | 4 | 4 | 4 | 4 | 4 | 4 | 4 | 4 | 4  | 4 |   |
| Constant unwarranted request for attention or help | 1      | 1 | 1      | 1 | 1 | 1 | 1 | 1 | 1 | 1 | 1 | 1  | 1      | 1 | 1 | 1 | 1 | 1 | 1 | 1 | 1 | 1  | 1      | 1 | 1 | 1 | 1 | 1 | 1 | 1 | 1 | 1  | 1 |   |
| Repetitive sentences or question                   | 1      | 1 | 1      | 1 | 1 | 1 | 1 | 1 | 1 | 1 | 1 | 1  | 1      | 1 | 1 | 1 | 1 | 1 | 1 | 1 | 1 | 1  | 1      | 1 | 1 | 1 | 1 | 1 | 1 | 1 | 1 | 1  | 1 |   |
| Hitting                                            | 5      | 5 | 1      | 1 | 1 | 1 | 1 | 1 | 1 | 1 | 1 | 1  | 1      | 1 | 1 | 1 | 1 | 1 | 1 | 1 | 1 | 1  | 3      | 3 | 3 | 3 | 3 | 3 | 3 | 3 | 3 | 3  | 3 |   |
| Kicking                                            | 5      | 5 | 1      | 1 | 1 | 1 | 1 | 1 | 1 | 1 | 1 | 1  | 1      | 1 | 1 | 1 | 1 | 1 | 1 | 1 | 1 | 1  | 4      | 4 | 4 | 4 | 4 | 4 | 4 | 4 | 4 | 4  | 4 |   |
| Grabbing onto people                               | 1      | 1 | 1      | 1 | 1 | 1 | 1 | 1 | 1 | 1 | 1 | 1  | 1      | 1 | 1 | 1 | 1 | 1 | 1 | 1 | 1 | 1  | 4      | 4 | 4 | 4 | 4 | 4 | 4 | 4 | 4 | 4  | 4 |   |
| Pushing                                            | 4      | 4 | 1      | 1 | 1 | 1 | 1 | 1 | 1 | 1 | 1 | 1  | 1      | 1 | 1 | 1 | 1 | 1 | 1 | 1 | 1 | 1  | 4      | 4 | 4 | 4 | 4 | 4 | 4 | 4 | 4 | 4  | 4 |   |
| Throwing things                                    | 4      | 4 | 1      | 1 | 1 | 1 | 1 | 1 | 1 | 1 | 1 | 1  | 1      | 1 | 1 | 1 | 1 | 1 | 1 | 1 | 1 | 1  | 1      | 1 | 1 | 1 | 1 | 1 | 1 | 1 | 1 | 1  | 1 |   |
| Strange noises                                     | 1      | 1 | 6      | 6 | 6 | 6 | 6 | 6 | 6 | 6 | 6 | 6  | 6      | 1 | 1 | 1 | 1 | 1 | 1 | 1 | 1 | 1  | 1      | 1 | 1 | 1 | 1 | 1 | 1 | 1 | 1 | 1  | 1 |   |
| Screaming                                          | 1      | 1 | 6      | 6 | 6 | 6 | 6 | 6 | 6 | 6 | 6 | 6  | 6      | 1 | 1 | 1 | 1 | 1 | 1 | 1 | 1 | 1  | 4      | 4 | 4 | 4 | 4 | 4 | 4 | 4 | 4 | 4  | 4 |   |
| Biting                                             | 1      | 1 | 1      | 1 | 1 | 1 | 1 | 1 | 1 | 1 | 1 | 1  | 1      | 1 | 1 | 1 | 1 | 5 | 1 | 1 | 1 | 1  | 1      | 1 | 1 | 1 | 1 | 1 | 1 | 1 | 1 | 1  | 1 |   |
| Scratching                                         | 1      | 1 | 1      | 1 | 1 | 1 | 1 | 1 | 1 | 1 | 1 | 1  | 1      | 1 | 1 | 1 | 1 | 1 | 1 | 1 | 1 | 1  | 1      | 1 | 1 | 1 | 1 | 1 | 1 | 1 | 1 | 1  | 1 |   |
| Trying to get to a different place                 | 1      | 1 | 1      | 1 | 1 | 1 | 1 | 1 | 1 | 1 | 1 | 1  | 1      | 1 | 1 | 1 | 1 | 1 | 1 | 1 | 1 | 1  | 1      | 1 | 1 | 1 | 1 | 1 | 1 | 1 | 1 | 1  | 1 | 1 |
| Intentional falling                                | 1      | 1 | 1      | 1 | 1 | 1 | 1 | 1 | 1 | 1 | 1 | 1  | 1      | 1 | 1 | 1 | 1 | 1 | 1 | 1 | 1 | 1  | 1      | 1 | 1 | 1 | 1 | 1 | 1 | 1 | 1 | 1  | 1 | 1 |
| Complaining                                        | 1      | 1 | 1      | 1 | 1 | 1 | 1 | 1 | 1 | 1 | 1 | 1  | 1      | 1 | 1 | 1 | 1 | 1 | 1 | 1 | 1 | 1  | 1      | 1 | 1 | 1 | 1 | 1 | 1 | 1 | 1 | 1  | 1 | 1 |
| Negativism                                         | 4      | 4 | 1      | 1 | 1 | 1 | 1 | 1 | 1 | 1 | 1 | 1  | 1      | 1 | 1 | 1 | 1 | 1 | 1 | 1 | 1 | 1  | 1      | 1 | 1 | 1 | 1 | 1 | 1 | 1 | 1 | 1  | 1 | 1 |
| Eating/drinking inappropriate substances           | 1      | 1 | 1      | 1 | 1 | 1 | 1 | 1 | 1 | 1 | 1 | 1  | 1      | 1 | 1 | 1 | 1 | 1 | 1 | 1 | 1 | 1  | 1      | 1 | 1 | 1 | 1 | 1 | 1 | 1 | 1 | 1  | 1 | 1 |
| Hurt self or other                                 | 1      | 1 | 1      | 1 | 1 | 1 | 1 | 1 | 1 | 1 | 1 | 1  | 1      | 1 | 1 | 1 | 1 | 1 | 1 | 1 | 1 | 1  | 1      | 1 | 1 | 1 | 1 | 1 | 1 | 1 | 1 | 1  | 1 | 1 |
| Handling things inappropriately                    | 1      | 1 | 1      | 1 | 1 | 1 | 1 | 1 | 1 | 1 | 1 | 1  | 1      | 1 | 1 | 1 | 1 | 1 | 1 | 1 | 1 | 1  | 1      | 1 | 1 | 1 | 1 | 1 | 1 | 1 | 1 | 1  | 1 | 1 |
| Hiding things                                      | 1      | 1 | 1      | 1 | 1 | 1 | 1 | 1 | 1 | 1 | 1 | 1  | 1      | 1 | 1 | 1 | 1 | 1 | 1 | 1 | 1 | 1  | 1      | 1 | 1 | 1 | 1 | 1 | 1 | 1 | 1 | 1  | 1 | 1 |
| Hoarding things                                    | 1      | 1 | 1      | 1 | 1 | 1 | 1 | 1 | 1 | 1 | 1 | 1  | 1      | 1 | 1 | 1 | 1 | 1 | 1 | 1 | 1 | 1  | 1      | 1 | 1 | 1 | 1 | 1 | 1 | 1 | 1 | 1  | 1 | 1 |
| Tearing things                                     | 1      | 1 | 1      | 1 | 1 | 1 | 1 | 1 | 1 | 1 | 1 | 1  | 1      | 4 | 4 | 4 | 4 | 4 | 4 | 4 | 4 | 4  | 4      | 1 | 1 | 1 | 1 | 1 | 1 | 1 | 1 | 1  | 1 | 1 |
| Performing repetitious mannerisms                  | 6      | 6 | 1      | 1 | 1 | 1 | 1 | 1 | 1 | 1 | 1 | 1  | 1      | 1 | 1 | 1 | 1 | 1 | 1 | 1 | 1 | 1  | 1      | 1 | 1 | 1 | 1 | 1 | 1 | 1 | 1 | 1  | 1 | 1 |
| Making verbal sexual advances                      | 1      | 1 | 1      | 1 | 1 | 1 | 1 | 1 | 1 | 1 | 1 | 1  | 1      | 1 | 1 | 1 | 1 | 1 | 1 | 1 | 1 | 1  | 1      | 1 | 1 | 1 | 1 | 1 | 1 | 1 | 1 | 1  | 1 | 1 |
| Making physical sexual advances                    | 1      | 1 | 1      | 1 | 1 | 1 | 1 | 1 | 1 | 1 | 1 | 1  | 1      | 1 | 1 | 1 | 1 | 1 | 1 | 1 | 1 | 1  | 1      | 1 | 1 | 1 | 1 | 1 | 1 | 1 | 1 | 1  | 1 | 1 |
| General restlessness                               | 6      | 5 | 6      | 6 | 6 | 6 | 6 | 6 | 6 | 6 | 6 | 6  | 6      | 1 | 1 | 1 | 1 | 1 | 1 | 1 | 1 | 1  | 1      | 1 | 1 | 1 | 1 | 1 | 1 | 1 | 1 | 1  | 1 | 1 |

Frequency Scale of Scores: 1 Never; 2 Less than once a week; 3 Once or twice a week; 4 Several times a week; 5 Once or twice a day; 6 Several times a day; 7 Several times an hour.
